1 **Monitoring systems for resistance to plant protection**  
2 **products across the world: Between redundancy and**  
3 **complementarity**

4  
5 **Short running title:** Monitoring systems for resistance to plant protection products across the world

6  
7 **Authors:** R4P network

8  
9 The Reflection and Research Ring on Pesticide Resistance (R4P) is constituted of:

10 **Authors' institutional affiliations:** Benoit Barrès, Université de Lyon, Anses, INRAE, USC CASPER,  
11 69007 Lyon, France ; Marie-France Corio-Costet, INRAE, Bordeaux Science Agro, UMR SAVE, ISVV,  
12 Labex Cote, 33882 Villenave d'Ornon, France ; Danièle Debieu, Université Paris-Saclay, INRAE,  
13 AgroParisTech, UMR BIOGER, 78850 Thiverval-Grignon, France; Christophe Délye, INRAE  
14 Agroécologie, Dijon, France ; Sabine Fillinger, Université Paris-Saclay, INRAE, AgroParisTech, UMR  
15 BIOGER, 78850 Thiverval-Grignon, France; Bertrand Gauffre, PSH - Unité de recherche Plantes et  
16 Systèmes de Culture Horticoles, INRAE, Avignon, France ; Jacques Grosman, DRAAF-SRAL Auvergne-  
17 Rhône-Alpes, Lyon, France ; Mourad Hannachi, Université Paris-Saclay, INRAE, AgroParisTech, UMR  
18 SADAPT, 78850 Thiverval-Grignon, France ; Pauline de Jerphanion, Unité Épidémiologie et Appui à la  
19 Surveillance, Université de Lyon, Anses, 69007 Lyon, France ; Gaëlle Le Goff, Université Côte d'Azur,  
20 INRAE, CNRS, ISA, 06903 Sophia Antipolis, France ; Christophe Plantamp, Université de Lyon, Anses,  
21 INRAE, USC CASPER, 69007 Lyon, France ; Myriam Siegwart, PSH - Unité de recherche Plantes et  
22 Systèmes de Culture Horticoles, INRAE, Avignon, France ; Anne-Sophie Walker, Université Paris-  
23 Saclay, INRAE, AgroParisTech, UMR BIOGER, 78850 Thiverval-Grignon, France; Lise Nistrup-  
24 Jørgensen\*, Aarhus University, Dept. of Agroecology, Denmark

25 \* Invited guest of R4P to contribute to this paper

26

27 **Corresponding author:** Anne-Sophie Walker, Université Paris-Saclay, INRAE, AgroParisTech, UMR

28 BIOGER, 78850 Thiverval-Grignon, France

29 [anne-sophie.walker@inrae.fr](mailto:anne-sophie.walker@inrae.fr)

30

31

32 **Abstract:**

33 BACKGROUND: Monitoring resistance to Plant Protection Products (PPPs) is crucial for understanding  
34 the evolution of resistances in bioagressors, thereby allowing scientists to design sound bioagressor  
35 management strategies. Globally, resistance monitoring is implemented by a wide range of actors  
36 that fall into three distinct categories: academic, governmental, and private. The purpose of this  
37 study was to investigate worldwide diversity in PPP resistance monitoring systems, and to shed light  
38 on their different facets. RESULTS: A large survey involving 162 experts from 48 countries made it  
39 possible to identify and analyze 250 resistance monitoring systems. Through an in-depth analysis, the  
40 features of the different monitoring systems were identified. The main factor differentiating  
41 monitoring systems was essentially the capabilities (funding, manpower, technology, etc.) of the  
42 actors involved in each system. In most countries, and especially in those with a high Human  
43 Development Index, academic, governmental, and private monitoring systems coexist. Overall,  
44 systems focus far more on monitoring established resistances than on the detection of emerging  
45 resistances. Governmental and private resistance monitoring systems generally have considerable  
46 capacities to generate data, whereas academic resistance monitoring systems are more specialized.  
47 Governmental actors federate and enroll a wider variety of stakeholders. CONCLUSION: The results  
48 show functional complementarities between the coexisting actors in countries where they coexist.  
49 We suggest PPP resistance monitoring might be enhanced if the different actors focus more on  
50 detecting emerging resistances (and associated benefits) and increase collaborative and collective  
51 efforts and transparency.

52

53 **Keywords:** pesticide resistance monitoring; insecticide; herbicide; fungicide; institutional analysis  
54 and development; surveillance

55

56

## 57 **1. Introduction & background**

58 Plant Protection Products (PPPs) include active ingredients or organisms used to kill, alter the  
59 development of, or mitigating the deleterious effects of plant bioagressors such as animals,  
60 pathogens, and weeds. In agriculture, PPPs can select resistant bioagressor genotypes that have the  
61 inheritable ability to survive PPP concentrations that kill or inhibit the development of sensitive  
62 genotypes of the same species. Resistance is generally selected from existing bioagressor genetic  
63 variation or from *de novo* mutations (Hawkins et al., 2019; R4P, 2016). When the proportion of  
64 resistant genotypes in one bioagressor population is high enough, resistance leads to a visible  
65 decrease in the efficacy of PPP applications in the field. This is “resistance in practice”, which is  
66 considered a side effect of PPP use. It may lead farmers to carry out additional applications of higher  
67 doses of the PPP concerned, or use other PPPs with possibly less favorable ecotoxicological profiles.  
68 Bioagressor resistance has considerable economic consequences worldwide in terms of additional  
69 PPP use, compensatory agronomic practices, food production losses, and environmental pollution  
70 (Palumbi, 2001). A recent study conducted in the United Kingdom estimated that herbicide  
71 resistance can double the economic costs of weed management (Hicks et al., 2018). Other studies  
72 concluded that weed management costs could increase by between USD 85 and USD 138.ha<sup>-1</sup> when  
73 herbicide resistance is present (Lambert et al., 2017; Zhou et al., 2015). Therefore, managing the  
74 evolution of resistance is a major challenge in crop protection, in line with the increasing social  
75 pressure for less dependence on chemical inputs in agriculture (Jørgensen et al., 2020). This concern  
76 has been translated into law in many countries and implied the development of specific regulations  
77 (Box 1) and of dedicated PPP risk indicators (Box 2).

78 Efficient resistance management relies: (i) on the use of bioagressor control practices that do not  
79 resort to PPP (e.g. resistant cultivars, prophylaxis, etc.), and (ii) if needed, the judicious application of  
80 PPPs following anti-resistance strategies, namely alternating PPPs, using mixtures, applying spatial  
81 mosaic practices, or dose modulation, so as to maximize the heterogeneity of selection applied on

82 bioagressor genotypes (Délye et al., 2013; Jørgensen et al., 2017; REX\_Consortium, 2013; van den  
83 Bosch et al., 2014). While the relative efficacies of the different strategies in impeding resistance  
84 development are still debated, probably because they closely depend on bioagressor biology and  
85 resistance genetics, there is a consensus that the management of resistance at the earliest stages of  
86 its development is a prerequisite for the sustainability of PPP efficacy. Designing efficient strategies  
87 for PPP resistance management requires knowledge of the resistance status and resistance  
88 mechanisms of a given bioagressor to one or several PPPs, and therefore depends on information  
89 obtained from PPP resistance monitoring and academic research (see an example in Box 3).

90 PPP resistance monitoring involves regular collection of data on the occurrence, frequency, and/or  
91 location of bioagressor genotypes with phenotypic and genetic characteristics making them resistant  
92 to PPPs. Resistance monitoring is used across the world to assess and curb the incidence of resistant  
93 human pathogens (Broekmans et al., 2002; Mölsted et al., 2017; Zignol et al., 2018) or animal  
94 pathogens (Werner et al., 2018), or for food safety (Mc Nulty et al., 2016; Pruden et al., 2018). In  
95 many countries, resistance monitoring is a prerequisite for PPP authorization and a key component  
96 of the post-authorization phase, and therefore falls within the jurisdiction of governmental and  
97 regulatory authorities. It also enables forecasting of in-field PPP efficacy and makes it possible to put  
98 forward preventive measures against the development of resistance. In addition, resistance  
99 monitoring is instrumental in further adapting stakeholder strategies and in preventing crop  
100 protection impasses. Resistance monitoring helps to optimize the efficient use of PPPs, maintain  
101 their efficacy and guides commercial and R&D strategies in the plant protection product industry.  
102 Consequently, there is a market for PPP resistance monitoring data, which attracts private  
103 organizations. On a different level, preventing the use of inefficient PPPs by adequate resistance  
104 monitoring contributes to the public interest objective of limiting the overall amount of PPPs used in  
105 a country and is therefore the purview of public institutions. Moreover, PPP resistance monitoring is  
106 also of interest for academic scientists studying the evolution of bioagressors. Clearly, PPP resistance  
107 constitutes a textbook example of an evolutionary process that can be observed at contemporary

108 scales (e.g. (Blake et al., 2018; Garnault et al., 2019; Hicks et al., 2018; Labbé et al., 2007). PPP  
109 resistance monitoring is therefore implemented by a variety of actors who fall into three main  
110 categories: academic, governmental, and private. Despite the importance and the diversity of the  
111 issues associated with PPP resistance monitoring, no quantitative or qualitative information had  
112 previously been published at a worldwide level on the organization of PPP resistance monitoring.  
113 Furthermore, the handful of studies that have investigated the organization of PPP resistance  
114 monitoring all focused on a specific topic and/or considered a limited number of countries. Examples  
115 include a public-private partnership for insecticide resistance management of the diamondback moth  
116 in Hawaii (Krell et al., 2016), a public-private consortium to study fungicide resistance in *Septoria* leaf  
117 blotch on wheat in Europe (Jørgensen et al., 2018), institutional organization of monitoring  
118 approaches for resistance to transgenic *Bacillus thuringiensis* (Bt)-crops in four countries (Carriere et  
119 al., 2019), and an overview on herbicide resistance management across the world with few details on  
120 monitoring (Peterson et al., 2018).

121 This study aimed to describe the diversity of actors and features of PPP resistance monitoring within  
122 and among countries, to explore the factors underlying this diversity, and to identify possible  
123 synergies. Our general hypothesis was that functional complementarities between the coexisting  
124 actors in a given country may explain the diversity of monitoring systems observed around the world.  
125 To test this assumption, we used a multilevel case study questionnaire methodology (Eisenhardt,  
126 1989; Yin, 2003), and more precisely, an embedded, multiple-case research design (Yin, 2003). The  
127 most important level we considered was the Resistance Monitoring System (RMS), which is an  
128 organization with its own objectives, resources, and rationales that produces and organizes PPP  
129 resistance monitoring (**Figure 1**). An RMS produces Resistance Monitoring Information Products  
130 (RMIPs), deliverables that enable actors to visualize and track the development of resistance,  
131 whether these products are publicly shared or not. An RMS may produce several different  
132 information products. At a higher level, in a given country, the coexisting RMSs shape a National  
133 Resistance Monitoring Landscape (NRML). Based on this multilevel design, we: (i) described the

134 diversity of RMSs around the world, and tested whether the NRML could be related to country's

135 Human Development Index (HDI), (ii) described similarities and differences regarding the various

136 RMSs, and (iii) characterized the interplay between actors that implement different RMSs.

137

## 138 **2. Methods**

### 139 **2.1. Questionnaire design**

140 Based on a preliminary investigation, we defined three categories of RMS, based on the type and  
141 funding of the organization in charge: Academic, Governmental, and Private. An Academic RMS is a  
142 monitoring initiative carried out by academic actors, where the main aim is the scientific study of  
143 resistance evolution. A Governmental RMS is an initiative aimed at producing publicly available  
144 information for agricultural extension services and state services for PPP evaluation and  
145 authorization, and to address PPP regulation questions (e.g. non-intentional effects of PPPs such as  
146 the selection for resistances). A Private RMS is a resistance monitoring initiative carried out by  
147 private actors, where the main aim is to detect and track the spread of resistance, with the aim of  
148 supporting R&D and PPP stewardship, as well as PPP evaluation by the authorities.

149 The questionnaire was composed of a series of 75 directive and 35 non-directive questions  
150 (Supporting Information 3). Both directive and non-directive questions explored the reasons and  
151 rationales of the RMS by addressing various features (informant details, country, etc.). The  
152 respondents were asked to list all the existing RMSs they were aware of in their country, as well as  
153 the reasons and rationales for each of them. One respondent could describe up to one RMS  
154 belonging to each category (maximum 3 RMS per respondent) to focus on the RMSs they know best  
155 and to avoid bias such as the overrepresentation of some countries and a strong heterogeneity in  
156 responses among respondents. The questionnaire also asked for details on each RMS listed by the  
157 respondent (e.g. category, objectives, spatial and temporal scales, methodology, funding, links with  
158 registration and regulation, communication of results, etc.). The last part of the questionnaire  
159 explored the collection and availability of data on PPP use throughout the respondents' countries,  
160 (through sales data and/or survey). These data are useful for resistance monitoring in order to select  
161 PPPs of interest and to focus resources on regions where selection pressure toward resistance is high  
162 (see Box 2 for a detailed example). When the question was directive (multiple-choice), a free



163 response insert was available to add an option or make a comment. Hence, several of these  
164 responses and options were re-encoded for the analysis to create groups, when relevant.

## 165 **2.2. Data collection**

166 The experts contacted in a preliminary phase were chosen for their ability to identify the PPP  
167 resistance monitoring initiatives and/or their own participation in such monitoring programs in their  
168 country. In addition, we tried to balance the number of experts in each major category of pesticides  
169 by sending the questionnaire to a similar number of experts in insecticide, fungicide and herbicide  
170 resistance. In a second phase, we used a snowball sampling technique: the initial respondents were  
171 invited to recruit new respondents meeting the eligibility criteria mentioned above. This sampling  
172 technique was used because of the difficulty in identifying resistance monitoring experts  
173 internationally (Heckathorn, 1997). The questionnaire was sent via a *Sphinx* software internet link  
174 from October 3, 2016 to November 22, 2017.

175

## 176 **2.3. Data analysis**

177 For each country, responses concerning RMSs were aggregated to generate comprehensive  
178 information on its NRML. Countries with one or few respondents were not excluded from the  
179 analysis. However, this criterion was taken into account when interpreting the data and comparing  
180 countries. For countries with several respondents, such as European Union countries, Australia and  
181 the United States, answers about the NRML were consistent among respondents. Similarly, for each  
182 RMS described, we asked which resistance topics were monitored (one topic = one triplet: crop ×  
183 bioaggressor × PPP active ingredient). These topics were then grouped according to bioaggressor types  
184 (fungi, insects, weeds, and combinations of these three types). These answers were compiled for  
185 each country.

186 To analyze whether countries with a higher development level were characterized by a more diverse  
187 NRML, we used the 2016 Human Development Index (HDI (UNDP, 2016)), a composite statistical

188 value of life expectancy, education, and per capita income indicators (Anand & Sen, 1994)). The  
189 influence of the HDI on the presence of each RMS category and the influence of the HDI on the type  
190 of collection of PPP use data in each country were tested using generalized linear regressions with a  
191 binomial distribution of errors and logit link function.

192 The effect of the category of RMS on the number of actor types participating in the choice of the  
193 monitored topics, or in the resistance data analysis, were tested using a non-parametric Kruskal-  
194 Wallis rank-sum test. All other tests of relationships between different qualitative variables were  
195 conducted by chi-squared ( $\chi^2$ ) tests of independence. When the number of replicates was too small  
196 for a  $\chi^2$  test, we used a  $\chi^2$  test with Monte-Carlo simulations using 2,000 replicates to compute  $p$ -  
197 values, or opted for a qualitative comparative analysis (Greckhamer et al., 2008; Livne-Tarandach et  
198 al., 2015). All statistical analyses were carried out using the statistical software R 3.6.1 (R Core Team,  
199 2019). The data and code are available in a Zenodo online repository  
200 (<http://doi.org/10.5281/zenodo.3723898>).

201

202

### 203 **3. Results and discussion**

204 The questionnaire was sent to 554 experts on PPP resistance monitoring from 74 countries, including  
205 283 experts in Europe and 271 outside Europe. A total of 162 experts (29 %) from 48 countries (65 %)  
206 responded to the questionnaire. The countries with the highest number of respondents were mainly  
207 located in Europe and North America (**Figure 2A**). Europeans represented 64 % of the respondents  
208 (103 experts), despite our efforts to collect data from a wide range of countries. The main group of  
209 respondents was academic experts (66 % of the respondents). The other groups identified were  
210 executives in government organizations (20 %), experts from private companies (10 %), and  
211 extension services and agricultural consulting companies (4 %). The area of expertise of most  
212 respondents was herbicide or fungicide resistance (32 % and 30 %, respectively), followed by  
213 insecticide resistance (18 %), and generalist experts (more than one area of expertise, representing  
214 20 %) (**Figure 2B**). With our questionnaire approach, we inventoried 250 RMSs worldwide, relatively  
215 well balanced among countries and among the categories defined for this study, i.e Academic,  
216 Governmental, and Private (**Figures 2C and 2D**).

#### 217 **3.1. Diversity of NRMLs around the world**

##### 218 **3.1.1. All categories of RMSs coexist in most of the respondent countries**

219 The most frequent situation (44 % of the countries surveyed) was the coexistence of the three  
220 categories of RMS (namely Academic, Governmental, and Private). The next two most frequent  
221 situations were the existence of Academic RMSs only and the coexistence of Academic and Private  
222 RMSs (17 % of the countries surveyed each). All other situations represented less than 4 % each. The  
223 NRML was reported to be coexistence between Governmental and Private RMSs in a single country,  
224 with one respondent. Four other countries reported no RMS. However, it should be noted that for  
225 each of these five cases, the information was provided by a single respondent, thereby limiting its  
226 reliability.

### 227                    3.1.2. The HDI value influences NRML diversity and collection of PPP use data

228    The three categories of RMS were present in 83 % of the countries with an HDI > 0.9, in 45 % of the  
229    countries with an HDI between 0.8 and 0.9, and in 17 % of the countries with an HDI < 0.8  
230    (**Figure 3A**). Importantly, countries with an HDI < 0.8 had the least diversified NRMLs, with an  
231    overrepresentation of Academic RMSs (10 out of 12 had Academic RMSs, including five with only  
232    Academic RMSs). Consistently, the presence of Governmental RMSs was significantly more likely in  
233    countries with a high HDI ( $p = 0.018$ , **Figure S1.1**, supporting information). By contrast, the  
234    occurrence of Academic and Private RMSs did not significantly correlate with HDI ( $p = 0.429$  and  
235    0.746, respectively, **Figure S1.1**, supporting information).

236    PPP use was monitored through records of sales data from PPP distributors (53 %), through  
237    consumer surveys on PPP use (8 %), or through a combination of both (23 %). Data on PPP sales were  
238    collected mainly at the national and regional scales (47 % and 33 %, respectively), while surveys on  
239    PPP use were conducted at more local geographic scales (22 % at the field level, 42 % at a regional  
240    scale, and 17 % at the national scale). The procedure to collect data on PPP use differed according to  
241    the HDI: the higher the HDI, the higher the proportion of countries using both sales and surveys to  
242    collect data on PPP use (**Figure 3B**). Consistently, countries with high HDIs were more likely to use  
243    data on PPP based on ‘sales’ and ‘survey data’ to adapt their monitoring systems ( $p = 0.019$  and  
244    0.058, respectively, **Figure S1.2**, supporting information).

245    Interestingly, the more comprehensive the collection of data on PPP use, the more diverse the NRML  
246    (**Figure 3C**,  $\chi^2 = 10.6$ , Monte-Carlo  $p = 0.008$ ). In the three countries where no collection of data on  
247    PPP use was reported, the NRML relied on only one category of RMS. Conversely, 87 % of the  
248    countries monitoring PPP use through both sales and surveys had the three RMS categories. This  
249    association may be found primarily in countries where governmental policies are being implemented,  
250    in particular to mitigate the environmental impact of agriculture.

251

252

## 253 **3.2. Features of RMSs**

### 254 **3.2.1. Governmental and Private RMSs are generalists, while Academic RMSs are more** 255 **specialized**

256 Regardless of their category, 46 % of the RMSs considered a maximum of five topics per year and  
257 43 % considered from 5 to 20 topics per year. Only 11 % of the RMSs managed more than 20 topics  
258 per year. Private RMSs were the most involved in managing a high number of topics (47 % of the  
259 RMSs surveying more than 20 topics were Private).

260 Among the RMSs identified, 38 % produced RMIPs on herbicides, 29 % on fungicides, 20 % on  
261 insecticides, and 12 % on at least two bioagressor types (**Figure 4A**). Most RMSs were dedicated to a  
262 single bioagressor type, regardless of the RMS category. The proportion of RMSs investigating more  
263 than one type of bioagressor was significantly higher in Governmental RMSs (24 %), compared to  
264 Private (13 %) and Academic (3 %) ones (**Figure 4B**) ( $\chi^2 = 12.3$ , Monte-Carlo  $p = 0.002$ ).  
265 Governmental RMSs specialized in fungi only were proportionally less apparent. Academic RMSs  
266 appeared to be more specialized, i.e. focused on a limited number of bioagressors type. This is most  
267 likely because Academic RMSs are usually part of broader research programs aimed at understanding  
268 the mechanisms and processes involved in the selection of resistance and at predicting the evolution  
269 of resistances or the associated risks. By contrast, governmental and private actors are mostly  
270 interested in obtaining an accurate picture of the resistance status for management or regulation  
271 purposes.

### 272 **3.2.2. All RMSs address emerging and established resistances, but focus mainly on loss of** 273 **PPP efficacy**

274 RMSs aim either at detecting emerging resistances or at assessing the extent of established  
275 resistances, since it can affect the type of resistance management implementation, more or less

276 preventive. Irrespective of their category, the vast majority of RMSs had both objectives (71 %),  
277 whereas 16 % and 13 % of the RMSs focused exclusively on established resistances or emerging  
278 resistances, respectively. We did not detect a significant correlation between the number of RMS  
279 objectives and the number of RMS categories in the NRML ( $\chi^2 = 4.68$ , Monte-Carlo  $p = 0.319$ ).  
280 However, for countries with a single category of RMS, the proportion of RMSs with both objectives  
281 tended to be slightly lower (60 %) than in the countries where two or three categories of RMSs  
282 coexisted (64 % or 74 %, respectively).

283 The sampling procedure tended to differ between RMS categories ( $\chi^2 = 5.82$ ,  $p = 0.054$ ). Regardless  
284 of the RMS, the most frequent cause for field sampling was a reduction or disruption of treatment  
285 efficacy represented by 42 %, 42 %, and 49 % of responses in Academic, Governmental and Private  
286 RMSs, respectively (**Figure 4C**). Regarding the second sampling procedure, Academic and  
287 Governmental RMSs tended to use more random sampling than Private RMSs (32 % and 29 % vs.  
288 21 %, respectively), while Private RMS sampling procedures were more often based on selection  
289 pressure, i.e. on data on PPP use (31 %).

### 290 **3.2.3. Data collection methods and analytical techniques are similar among RMSs**

291 Collecting relevant metadata associated with the history of the fields sampled (crop, GPS  
292 coordinates, bioaggressor intensity, and history of PPP used) is an important part of resistance  
293 monitoring. These data can also be used for statistical and modelling analyses, which are necessary  
294 to assist the development of management strategies. We therefore surveyed how metadata were  
295 collected: on paper, digitally, or both. Using paper forms only was the most represented data  
296 collection methods in all RMS categories (56 %). A small trend was found for exclusively digital  
297 metadata collection that was more widespread in Academic RMSs than in the others.

298 Analytical techniques, including bioassays, biomolecular methods, or biochemical approaches, differ  
299 in cost, sensitivity, and specificity (R4P, 2016). There were no differences in the respective use of

300 these different techniques for resistance detection among RMS categories ( $\chi^2 = 11.1$ , Monte-Carlo  
301  $p = 0.550$ ), despite different financial constraints between RMS categories, and despite the need for  
302 different technological expertise. Bioassay was the most frequently used technique in all RMSs  
303 (95 %), while 77 % and 34 % of the RMSs used biomolecular and biochemical tests, respectively. The  
304 use of two different analytical techniques in the same RMS was the most frequent (46 % of the  
305 RMSs), with almost exclusively a combination of bioassays and biomolecular techniques. RMSs using  
306 only one technique (24 % of the RMSs) used bioassays in the vast majority of cases (83 %). Lastly,  
307 30 % of the RMSs, especially those investigating herbicide and insecticide resistances, combined the  
308 three techniques. Interestingly, non-target site resistance due to detoxication enzymes is more  
309 frequent in these types of bioagressors and the analysis of this resistance requires a multiscale  
310 approach from gene to phenotype (Hawkins et al., 2019).

311

#### 312 **3.2.4. Diffusion and publication of the RMIPs vary according to the category of RMS**

313 Publishing clear, up-to-date, and relevant RMIPs is important to assist growers and stakeholders in  
314 implementing efficient actions to manage resistance. RMIP publication significantly differed among  
315 RMS categories ( $\chi^2 = 50.1$ , Monte-Carlo  $p < 0.001$ , **Figure 4D**). The vast majority of the RMIPs were  
316 published (87 %). Nearly all unpublished RMIPs (92 %) were from Private RMSs. Unpublished RMIPs  
317 might be used in post-authorization reports, which are not considered formal publications and are  
318 restricted to official authorities. Alternatively, RMIPs may be considered strategic and fall under  
319 corporate proprietary information for private stakeholders and are intended for internal use only (for  
320 commercial and R&D strategies) By contrast, Governmental RMSs systematically published RMIPs,  
321 usually on an annual basis (57 %), which probably aimed at assisting resistance management and are  
322 intended to inform a broad audience. Academic RMSs published RMIPs on a less regular basis, in line  
323 with their main objective of publishing scientific articles in peer-reviewed journals, which implies  
324 combining multi-year monitoring data for population studies, resistance evolution assessments, or

325 investigations of resistance mechanisms (e.g. Blake et al., 2018; Garnault et al., 2019; Hicks et al.,  
326 2018; Labbé et al., 2007).

327

### 328 **3.3. Complementarities and interplays between RMSs and actors**

#### 329 **3.3.1. RMS funding**

330 Private actors such as agrochemical companies or PPP retailers (grower cooperatives, vendors) were  
331 the main funders of RMSs (**Figure 5A**). They were the sole funding source for 32 % of the RMSs  
332 identified, and one of the funding sources for 30 % of the RMSs. The strong implication of private  
333 actors in RMS funding likely reflects the strategic impact of PPP resistance on their business for both  
334 regulatory obligations and their interest in PPP durability as well as to guide their strategy for the  
335 development of new active substances by identifying and understanding resistance mechanisms. All  
336 funding combinations were represented, but single-source funding dominated the picture (66 %, **Figure 5A**). However, different situations were observed according to the RMS category when  
337 considering self-funding ( $\chi^2 = 52.5$ , Monte-Carlo  $p < 0.001$ ). Most Private RMSs were funded by  
338 private funds only (81 %), while private funding also supported Academic and Governmental RMSs.  
339 By contrast, Academic RMSs mixed all possible funding sources and academic funding supported  
340 almost exclusively Academic RMSs (**Figure 5A**). We suggest that the overall lower academic funding  
341 dedicated to resistance monitoring has two main causes: firstly, academic endowments are generally  
342 insufficient to support extensive or continued monitoring, and secondly, resistance monitoring is  
343 needed on a less regular basis for resistance research. Surprisingly, one out of 48 Private RMSs was  
344 entirely financed by governmental funds and 4 out of 53 Governmental RMSs were entirely financed  
345 by private funds. Overall, co-funding from two or three sources was reported for 35 % of the RMSs  
346 (28 % and 7 %, respectively). Co-funding was more frequent for Governmental RMSs (49 %) than for  
347 Academic (36 %) or Private ones (17 %).



349 **3.3.2. Officially-standardized protocols are more conducive to public decision-making**

350 RMIPs can be used to authorize, improve, or ban PPP use. In countries where there is official  
351 standardization of the resistance monitoring protocol (recognized as “official” by the stakeholders),  
352 changes in PPP authorization or in recommendations of PPP use is more frequent following  
353 resistance detection ( $\chi_1^2 = 5.00, p = 0.025$ ).

354 **3.3.3. Governmental actors appear to be the most able to federate and enroll a wide**  
355 **variety of stakeholders**

356 The choice of the topics monitored by Governmental RMSs involved a wider range of actors (public  
357 administration, academics, companies, and others) than other RMS categories (Kruskal–Wallis  
358  $\chi_2^2 = 33.7, p < 0.001$ , **Figure 5B**). Twice as many partners were involved in Governmental RMSs  
359 compared to Academic and Private ones. Governmental actors lead may foster participation by  
360 others stakeholders because public involvement legitimizes the collective action.

361 **3.3.4. Academic actors are the major providers of capabilities and knowledge in the**  
362 **analysis and interpretation of monitoring data**

363 Data analysis is another important aspect of PPP resistance monitoring. It requires specific  
364 knowledge adapted to the sampling design and the analysis methods used to detect and/or quantify  
365 resistance. Regardless of the RMS, the number of types of experts who analyze data is the same (ca.  
366 1.5 persons; Kruskal–Wallis  $\chi_2^2 = 4.90, p = 0.080$ ). When considering all RMSs together, academics  
367 represent more than half of the experts involved in data analysis (52 %, **Figure 5C**).

368 The type of experts in charge of data analysis and interpretation differed according to the RMS  
369 categories ( $\chi^2 = 50.7$ , Monte-Carlo  $p < 0.001$ ). Data from Private RMSs were mostly analyzed by  
370 private actors (61 %, **Figure 5C**), but academics were also substantially involved in the analysis of  
371 Private RMS data (30 %). The vast majority of data from Academic and Governmental RMSs was

372 analyzed by academic actors (72 % and 50 %, respectively). Because PPP resistance data can have an  
373 impact on sales and market shares, they can be considered strategic by private stakeholders, from an  
374 economic point of view. This may explain why, despite the expertise of academics, the majority of  
375 the analyses of Private RMS data were conducted by the private stakeholders themselves.  
376 Conversely, Governmental RMSs may lack analytical skills and/or wish to avoid conflicts of interests,  
377 which may explain why they rely on academic rather than on private researchers for assistance with  
378 data analysis when external expertise is needed (DeAngelis, 2000; Robinson et al., 2013).

### 379 **3.3.5. Coexistence of different RMSs in a country increases the diversity of the types of** 380 **bioaggressors surveyed**

381 One of the greatest challenges in monitoring PPP resistances is the diversity of the topics to be  
382 considered, which implies dealing with a wide range of bioaggressors, each with its own biological and  
383 genetic specificities. Eighty percent of the countries with the three categories of RMS (representing  
384 40 % of all countries with respondents) had the three types of bioaggressors surveyed (**Figure 5D**).  
385 Below three RMSs, no specific NRML composition was associated with a higher number of types of  
386 bioaggressors surveyed. NRMLs were more often incomplete (not monitoring the three types of  
387 bioaggressors) when only one or two categories of RMS coexisted in the country (only 33 % and 27 %  
388 monitored the three types of bioaggressors, respectively). As a result, a diversified NRML seems to be  
389 correlated with more diverse and broader bioaggressor monitoring.

390

## 391 **4. General discussion**

392 Monitoring PPP resistance is pivotal for implementing integrated and sustainable bioaggressor  
393 management. This is the first study of this magnitude investigating the diversity of the RMSs  
394 throughout the world. Our study contains unavoidable bias, prominent among which is an over-  
395 representation of European Union and academic respondents (64 % and 66 %, respectively), while  
396 they represented 51 % and 65 % of the experts to whom the questionnaire was sent, respectively.

397 This might be a collateral effect of our “snowball” sampling strategy, with most respondents being  
398 academics. Our work nevertheless reveals contrasted NRMLs, possibly driven by variable incentives  
399 (Box 1). We identified the (co)existence of three categories of key actors: academic, governmental,  
400 and private organizations that support three different categories of RMSs. The distinction between  
401 Academic and Governmental RMS categories could be questioned, as the two categories might  
402 overlap and usually benefit largely from public funding. However, in some countries, academic actors  
403 such as universities might be private and, beyond funding, the results of our study support our initial  
404 distinction as the three RMS categories differ in many respects, including organization, capacities,  
405 and purposes.

406

407 All three categories of RMSs generate RMIPs that differ in many ways: their degree of independence  
408 towards their funding sources, their intended use, the possibility for their public release, and their  
409 frequency of publication when published. However, the three categories of RMSs share common  
410 data collections methods and analytical techniques. They also present similarities in their objectives  
411 and sampling protocols. Interestingly, while 84 % of the RMSs claim to focus on emerging resistances,  
412 only 28 % use sampling protocols that may effectively identify emerging resistances, i.e. sampling  
413 “hot spots” based on PPP use data (Box 2). This suggests that RMSs in fact target established  
414 resistances via targeted or random samplings. This argues in favor of directing more effort toward  
415 promoting sampling protocols enabling the detection of emerging resistances, as early  
416 implementation of resistance management is most effective.

417

418 We also investigated the interplay between private, academic and governmental actors and  
419 identified a pivotal role for governmental actors. When a Governmental RMS is present in a country,  
420 especially a country with a high HDI, the diversity of types of surveyed bioaggressors is higher, twice as  
421 many actor types are involved in the choice of topics, and data on PPP use are more comprehensive.  
422 This may be due to legal requirements for post-authorization procedures, a governmental

423 prerogative. In addition, Governmental RMSs appear to be best at fostering co-funding from several  
424 actor types with half Governmental RMSs funded by at least two actors' type. Governmental actors  
425 may be more trustworthy in the eyes of other actors. Altogether, this supports the relevance of  
426 generalized involvement of governments and/or their representatives in the monitoring systems  
427 (Fuglie & Toole, 2014; Krell et al., 2016; Wang et al., 2013). Governmental actors ability to include a  
428 broader range of partners seems to be beneficial as it combines the interests of the general public,  
429 producers, independent advisors, and markets, while promoting multi-actor synergies (Pinkse & Kolk,  
430 2012).

431

432 Our study quantified assets that are intuitively associated with each actor, as reported in the  
433 literature (Hurley & Frisvold, 2016; Krell et al., 2016). The results suggest that private actors have a  
434 strong funding capacity and are typically active in major agricultural regions, academic actors focus  
435 on few cases and are best in data analysis capacity and scientific knowledge, and governmental  
436 actors have a major focus on disseminating information on resistance. As a result, there are obvious  
437 complementarities between the different RMS types. Resistance monitoring at a national scale could  
438 be improved if the different actors increase collaborative and collective efforts to i) enhance official  
439 standardization of the monitoring protocols, ii) focus more on emerging resistances using PPP use  
440 data to design field sampling (Box 2), iii) enhance their coordination in the choice of topics surveyed,  
441 and iv) publish transparently and regularly RMIPs. We suggest these increased collaborative efforts  
442 should eventually end up with combined academic, governmental and private capacities in joint  
443 RMSs, as put forward during the Worldwide Insecticide-resistance Network Workshop in Brazil  
444 (Corbel et al., 2017), or in a recent study on co-evolutionary governance of resistance monitoring  
445 (Jørgensen et al., 2020). Our suggestion is similar to those made recently by Carrière et al (2019) on  
446 the monitoring of insect resistance to transgenic Bt crops. The proposed type of joint RMS was not  
447 found in our survey, possibly because of the design of our questionnaire that included an *a priori*  
448 separation between Academic, Governmental and Private RMSs. However, given that the

449 questionnaire included non-directive questions, the existence of joint RMSs would likely have  
450 emerged if it had been a frequent occurrence. Beyond potential direct synergies in joint RMSs, there  
451 are indirect synergies when Academic, Governmental and Private RMSs coexist in the same NRML  
452 (see example in Box 3). On the one hand, this cohabitation might generate redundancy in resistance  
453 topics surveyed. On the other, cohabitation increases the diversity of types of bioagressors surveyed  
454 in the country, and thereby generates mutual benefits by increasing the performance of monitoring  
455 programs. This might be due to emulation and competition among actor types, in particular for  
456 emerging resistance of significant economic interest.

457

458 Surveying changes in national RMSs and NRMLs over time should make it possible to identify  
459 additional complementarities, synergies, or tensions between RMSs. For example, Private and  
460 Governmental RMSs may clearly have antagonistic interests regarding data publication or  
461 transparency. Additional, more focused investigations could also reveal more complex NRMLs than  
462 inventoried here, in particular for regions of the world that are less represented in our survey, such  
463 as Africa or Oceania. Thanks to the present paper, we may expect more respondents from countries  
464 outside EU in future surveys. Importantly, our study investigated only RMSs and the production of  
465 RMIPs. A step forward would be to include the effective impact of the RMIPs (e.g., to adapt  
466 strategies for PPP use) on their final recipients, with each recipient category acting at their own  
467 geographical scale (e.g., growers, salespersons, technical consultants, and scientists). It would be  
468 interesting to identify the category or type of organization of RMSs that effectively prompts the final  
469 recipients to adapt or change their practices on the basis of the RMIPs. The highest utility of an RMS  
470 is no doubt reached when farmers effectively take into account the information provided by RMIPs  
471 when designing their bioagressor control tactics (Givens et al., 2011; Johnson & Gibson, 2006; Leach  
472 et al., 2019; Llewellyn et al., 2007; Ulber & Rissel, 2018). The potential impact of RMIPs depends on  
473 four characteristics: transparency, pedagogy, regular updates, and broad diffusion (via extension

474 services, agricultural newspapers, and journals or websites). National and international groups that  
475 review and diffuse RMIPs could be key actors alongside RMSs (see examples in SI 2).

476 Our survey described a large number of features, but did not evaluate RMS quality. RMS quality may  
477 vary depending on financial constraints, on the expertise of the actors involved, and on the  
478 operational constraints related to the bioaggressors monitored (Ambec & Desquilbet, 2012; Guedes,  
479 2017). Based on our results, approaches could be implemented to evaluate RMS quality with regard  
480 to their objectives, and assess the quality of their output RMIPs. One such approach is the OASIS  
481 method (Hendriks et al., 2011), which enables an in-depth analysis of the implementation and the  
482 quality of an epidemiological surveillance system, and the identification of recommendations for  
483 improvement.

484

## 485 **5. Conclusion**

486 Studying the worldwide diversity of organizations monitoring PPP resistance was a methodological  
487 challenge, and our study, although explorative and not without some unavoidable bias, is therefore  
488 an innovative and seminal research on an unexplored aspect of this crucial global issue. Charles  
489 Darwin wrote “In the long history of humankind (and animal kind, too), those who learned to  
490 collaborate and improvise most effectively have prevailed” (Darwin, 1859). Our survey revealed a  
491 diversity of RMSs with, in most countries, different categories of RMSs coexisting. Why and how  
492 could this “functional redundancy” be maintained? And why did the most effective RMS not prevail  
493 and lead the others to disappear? An analysis of the distinctive resources and the related outcome  
494 advantages of each RMS category suggests that better than mere coexistence, there is  
495 complementarity among them. The overall efficiency of an NRML could be improved if the different  
496 RMSs in different categories were merged, or better, moved towards open and transparent  
497 collaboration, and the different actors’ capabilities were pooled. This is where our study joins  
498 Darwin’s quotation. However, the benefits of RMS collaboration across categories have only been  
499 broached by the results of our explorative study, and need to be tested and studied more closely.

500 The antagonisms and synergisms between the different types of monitoring need to be investigated  
501 more in depth, as well as the expected benefits of collaboration. As a result, templates for multi-  
502 actor structures may be proposed to build efficient and comprehensive RMSs generating quality data  
503 and having a tangible impact on agricultural practices.

504

## 505 **6. Acknowledgments**

506 We would like to thank all the respondents who kindly participated in this survey. The original idea  
507 for this study came from a meeting of the EPPO ‘resistance panel’. This project was partly funded and  
508 supported by the French Agency for Food, Environmental and Occupational Health & Safety (ANSES)  
509 via the tax on sales of plant protection products. The proceeds of this tax are assigned to ANSES to  
510 finance the establishment of the system for monitoring the adverse effects of plant protection  
511 products, called ‘phytopharmacovigilance’ (PPV), established by the French Act on the future of  
512 agriculture dated October 13, 2014. The R4P network is supported by the Plant Health division of  
513 INRAE.

514

515

## 516 **7. Glossary**

517 **Bioagressor:** a living organism detrimental to crop production that can be an animal (arthropod,  
518 rodent, etc.), a plant (weed), or a phytopathogenic microorganism (bacterium, fungus, etc.).

519 **Emerging resistance:** early phase of resistance evolution, when resistant bioagressor genotypes are  
520 present at very low frequencies in one bioagressor population.

521 **Established resistance:** later phase of resistance evolution, when resistance disrupts bioagressor  
522 control in the field because the frequency of resistant bioagressor genotypes in the bioagressor  
523 population is sufficiently high.

524 **HDI:** Human Development Index, a composite statistical value of life expectancy, education, and per  
525 capita income indicators.

526 **Hot spot:** any area or place of known high levels of diversity or quantity of PPP use.

527 **NRML:** National Resistance Monitoring Landscape. At the country level, all existing resistance  
528 monitoring systems (RMSs) and their interactions.

529 **PPP:** Plant Protection Product. It includes active ingredients or organisms used to kill, alter  
530 development of, or mitigate the deleterious effects of plant bioagressors (animals, pathogens,  
531 weeds).

532 **PPP Resistance:** (i) Natural, inheritable ability of a bioagressor genotype (mutant, resistant genotype)  
533 to survive PPP concentrations that kill or inhibit the development of wild-type genotypes of the same  
534 species (sensitive genotypes); (ii) outcome of the adaptive evolution of bioagressors as a result of the  
535 selection pressure for less-PPP-sensitive genotypes exerted by PPPs.

536 **Resistant genotype:** bioagressor genotype having PPP resistance.

537 **Resistance monitoring:** regular collection of data on the occurrence, frequency, and/or location of  
538 resistant bioagressor genotypes.

539 **Resistance topic:** Crop × Bioagressor × PPP.

540 **RMIP:** Resistance Monitoring Information Product. A deliverable that enables actors to visualize and  
541 track the development of resistance, whether or not shared publicly.

542 **RMS:** Resistance Monitoring System. An organization or a group of organizations with their own  
543 objectives and resources (financial, technical and human) and rationales that organize PPP resistance  
544 monitoring and produce Resistance Monitoring Information Products (RMIPs). An RMS may produce  
545 several different information products. In this study, we defined three categories of RMS, based on  
546 the type of organization and their funding, namely

547 **--Academic RMS:** a resistance monitoring initiative carried out by academic actors, where the main  
548 aim is the scientific study of evolution of PPP resistance of bioagressors.



549 --**Governmental RMS**: a resistance monitoring initiative carried out by governmental actors, aimed at  
550 producing publicly available information for agricultural extension services and state services for PPP  
551 evaluation and authorization, and to address PPP regulation questions (e.g. non-intentional effects of  
552 PPPs such as the selection for resistances).

553 --**Joint RMS**: an ideal RMS that combines several types of actors (academic, governmental or/and  
554 private) managing the objectives and resources of resistance monitoring together.

555 --**Private RMS**: a resistance monitoring initiative carried out by private actors, where the main aim is  
556 to detect and track the spread of resistance, with the aim of supporting R&D and PPP stewardship, as  
557 well as PPP evaluation by the authorities.

558

## 559 **8. Boxes**

### 560 **Box 1: Rationales for resistance monitoring across the world**

561 NRMLs with the three RMS categories were more frequent in countries in the highest HDI classes  
562 (see Figure 3A). Beyond important differences in national wealth, one reason for this unequal pattern  
563 of resistance monitoring organization is that countries may have different incentives when  
564 authorizing PPPs. Safety for users and the environment is a common basic incentive for all countries.  
565 Efficacy is another crucial incentive when authorizing PPPs. Some countries consider that resistance-  
566 concerned PPPs will mechanically disappear from the market because of decreasing efficacy (e.g.  
567 resistance risk assessment is not a requirement in the US Pesticide Registration Improvement  
568 Extension Act PRIA 4, nor in New Zealand or Japan (resources in SI2)). In this way, it is considered a  
569 company responsibility to anticipate the resistance risk, to market sustainable products, and to  
570 recommend good practices. Other countries are more concerned about the selection of resistance  
571 and its impact on PPP efficacy. In fact, the rapid build-up of resistance that led to historical dramatic  
572 loss of efficacy in some situations (e.g. resistance to benzimidazoles or QoIs in many pathogens,  
573 resistance to diamide insecticides in Lepidopteran pests, resistance to ACCase inhibitors in grass  
574 weeds) certainly helped convince authorities of the importance of resistance prevention and  
575 management strategies to support farmers with appropriate information on resistance. The social  
576 pressure towards an agricultural model that is less dependent on chemical inputs may also have  
577 strengthened this concern, as resistance management implies substituting PPPs by alternative  
578 control methods and prevents inefficient spraying. This has been translated into law, especially in the  
579 European Union (e.g. Directive 2009/128/EC, (Parliament, 2009)), with the development of specific  
580 regulations (e.g. the “plan Écophyto” in France, which promotes integrated bioagressor management  
581 and non-chemical bioagressor control to reduce pesticide consumption). Resistance risk assessment  
582 is also a recommendation of the Food and Agriculture Organization of the United Nations (FAO) in its  
583 guidelines for the authorization of PPPs (resources in SI2). The requirement for resistance  
584 management is included in authorization dossiers in Australia (resources in SI2) and in EU countries.  
585 In fact, the systematic evaluation of resistance in marketing authorization dossiers for PPPs has been  
586 carried out in some EU countries for years, before EU regulations came into force. Then, resistance  
587 risk assessment was generalized at the European level in 1993 via Directive 91/414/EEC, then in 2011  
588 via Regulation (EC) No. 1107/2009, which is applied by all EU members states as a whole. The pre-  
589 marketing assessment makes it possible to take into account resistance phenomena and to anticipate  
590 problems, in particular concerning certain active ingredients that are subject to a high risk of  
591 resistance development. Some limitations on PPP use can be issued after evaluation of the marketing  
592 authorization application. Dossier requirements include sensitivity baselines, potential risk of target

593 resistance development, a cross-resistance analysis, population status for resistance and efficacy,  
594 and recommendations for resistance management. Similarly, China recently levelled up its  
595 requirements on resistance risk assessment (Regulation on the Administration of Pesticides – Decree  
596 677, resources in SI2), which in time may change the overall picture of resistance monitoring  
597 internationally.

598

599

600

601 **Box 2: Spray intensity maps provide potential information on hot spots for resistance development**

602 It is generally accepted that the higher the spray intensity with PPPs with the same mode of action,  
603 the higher the risk of resistance selection. Based on this, resistance monitoring would be focused on  
604 areas with the highest, temporally and spatially homogeneous use of PPPs.

605 In Europe, as part of EU regulations, all farmers are required to keep a record of PPP use on each of  
606 their fields. These data can be checked during inspection, but are only kept at the farm level and  
607 therefore do not provide an overall picture of the PPP use patterns. In Denmark, the farmers' records  
608 are compiled in a national database, with the overall aim of obtaining an accurate picture of PPP use  
609 across the country (known as "Pesticide Load", (Kudsk et al., 2018). According to the Danish Public  
610 Administration Act, information from the Danish database is publicly available. It is compulsory for  
611 farmers to upload information on crop area and PPP use by crop. Based on the collected information,  
612 hot spots of PPP use can be identified where the potential for resistance development can be  
613 expected to be high, as illustrated for a group of insecticides, fungicides and herbicides (Figure 6).  
614 The detailed information on PPP use available in the database allows for very detailed analyses of  
615 PPP use patterns, for instance over time, or by crop and regions (Jørgensen et al., 2019). The  
616 information can also be used to find hot spots for potential environmental impact and undesirable  
617 PPP effects, such as leaching (Kudsk et al., 2018), or for further investigations on the impact of  
618 specific crop rotations on the intensity of PPP use (Jørgensen et al., 2019). To our knowledge,  
619 Denmark is so far the only country with such a detailed system for recording the use of PPP.

620 The Danish Environmental Protection Agency (DEPA) uses data on annual PPP sales and usage. Until  
621 now, the data have not been used as background information for resistance monitoring, although  
622 this is feasible. Monitoring for PPP resistance in Denmark is mainly organized by academic  
623 institutions like Aarhus University, in collaboration with agrochemical companies and advisory  
624 services (SEGES), which help to organize the collection of samples across the country. An extensive  
625 partnership involving academic, governmental, and private actors addressing fungicide resistance  
626 monitoring is led by NorBaRAG, an international Nordic Baltic resistance action group (Kudsk, 2010).  
627 This has resulted in several papers providing an overall picture of the resistance situation (Heick et  
628 al., 2017).

629

630

631

632

633 **Box 3: Knowing the resistance status as a prerequisite for smart resistance management**

634 Gathering information on resistance to PPPs requires resources, field-oriented networks of  
635 stakeholders, and multi-scale organization within a country. RMS aims can be the detection of  
636 emerging resistance and the assessment of the prevalence of resistance in bioagressor populations.  
637 This information is crucial for the evaluation of the impact of anti-resistance strategies. In situations  
638 where the risk for resistance evolution is high, PPP users are expected to benefit from coordination  
639 fostered by sharing RMIPs, but this gain may be at the expense of agrochemical companies that may  
640 consequently face lower PPP demand (Lemarié & Marcoul, 2018). This makes information on  
641 resistance strategic, and may explain why different RMSs or types of RMSs coexist in the same  
642 country.

643 Resistance is also a hot topic for plant protection, because of growing social pressure towards  
644 agriculture that is less dependent on chemical inputs. Consequently, this may also lead to more  
645 complex NRMLs including complementary RMSs. In our questionnaire, we identified some initiatives  
646 trying to structure resistance monitoring at a national level and centralizing RMIPs (see SI2). As an  
647 example, we detail here the case of France, which is best known by the authors. Other countries may  
648 of course have equivalent or more comprehensive organizations.

649 Up to 5 RMSs can be distinguished in France. (1) Monitoring is achieved by agrochemical companies  
650 and their contractors (i.e. Private RMSs) to provide data for authorization dossiers, pre- and post-  
651 authorization, as required by European and French regulations. This information is used for  
652 marketing authorization, issued by the public agency in charge of PPP approvals. (2) Agrochemical  
653 companies, but also cooperatives, retailers, and extension services, represented by crop-specialized  
654 technical institutes, (i.e. Private RMSs) may also carry out more specific monitoring to accompany  
655 PPP development and offer use recommendations throughout the lifespan of the PPP. Such  
656 information is used for internal purposes or targeted publication towards stakeholders, and is in part  
657 summarized by Resistance Action Committees (RACs) on their websites. (3) Public research institutes  
658 also collect and analyze samples, often in collaboration with extension services, for basic research on  
659 resistance evolution, management, and mechanisms (i.e. Academic RMSs), which can be used for  
660 recommendations on resistance management, together with other stakeholders. (4) The French  
661 Ministry of Agriculture funds a national resistance monitoring plan (i.e. a Governmental RMS) aimed  
662 at detecting emerging resistances, with situations prioritized by field practitioners and experts. This is  
663 legitimated by the Écophyto national regulation that includes the monitoring of non-intended effects  
664 of PPP use. Samples are collected via a large range of partners, some being organized in networks.  
665 PPP sensitivity assays are achieved by a dedicated public laboratory and by research institutes.  
666 Results are used to inform public decision-making. (5) Phytopharmacovigilance (i.e. a Governmental  
667 RMS) is organized by the French Ministries of Agriculture, Human Health, and the Environment and

668 request the official declaration of resistance cases by any stakeholders. It relies on the previous RMSs  
 669 described and encourages all stakeholders to feed back information to identify early signs of  
 670 resistance. Its data are considered for post-authorization.

671 Finally, in addition to manufacturer use recommendations, available information from these various  
 672 RMSs is summarized by representatives of agricultural sectors and general experts in collaborative  
 673 notes freely available on the internet, in addition to resistance reports ([www.r4p-inra.fr](http://www.r4p-inra.fr)). Lists of  
 674 resistance cases are also regularly updated and reflect agriculture in France today, and its history of  
 675 PPP use (**Table 1**). They also orient further research and monitoring on resistance, as well as PPP  
 676 evaluation.

677

678 **Table 1:** Details on resistance cases detected in France (1978 – 2019).

| <b>Criteria</b>                                                  | <b>Fungicides</b>                                                                                                                  | <b>Insecticides-Miticides</b>                                                                                                                                                                 | <b>Herbicides</b>                                                                  | <b>Total</b> |
|------------------------------------------------------------------|------------------------------------------------------------------------------------------------------------------------------------|-----------------------------------------------------------------------------------------------------------------------------------------------------------------------------------------------|------------------------------------------------------------------------------------|--------------|
| <b>Number of resistance cases<sup>1</sup></b>                    | 83                                                                                                                                 | 53                                                                                                                                                                                            | 77                                                                                 | 213          |
| <b>Number of bioagressors</b>                                    | 32                                                                                                                                 | 25                                                                                                                                                                                            | 34                                                                                 | 91           |
| <i>Top 3 bioagressors</i>                                        | <i>Botrytis cinerea</i><br><i>Erysiphe graminis</i> f. sp.<br><i>tritici</i><br><i>Plasmopara viticola</i> (ex<br><i>aequo</i> )   | <i>Cydia pomonella</i><br><i>Myzus persicae</i><br><i>Aphis gossypii</i>                                                                                                                      | <i>Lolium</i> sp.<br><i>Alopecurus myosuroides</i><br><i>Papaver rhoeas</i>        |              |
| <b>Number of PPP modes of action<sup>3</sup>(chemical group)</b> | 21                                                                                                                                 | 13                                                                                                                                                                                            | 5                                                                                  | 39           |
| <i>Top 3 modes of action</i>                                     | Anti-microtubules (Benzimidazoles)<br>Inhibitors of cytochrome b, Qo site (Qols-P)<br>Inhibitors of succinate dehydrogenase (SDHs) | Voltage-gated sodium channel disruption (Pyrethroids)<br>GABA-gated chloride channel disruption (Organochlorides)<br>Acetylcholine esterase inhibitors (Organophosphates) ( <i>ex aequo</i> ) | ALS inhibitors (Sulfonylureas)<br>PsbA inhibitors (Triazines)<br>ACCase inhibitors |              |
| <b>Number of crops</b>                                           | 19                                                                                                                                 | 27                                                                                                                                                                                            | 14                                                                                 | 38           |
| <i>Top 3 crops</i>                                               | Wheat<br>Grapevine<br>Barley                                                                                                       | Apple<br>Oilseed rape<br>Peach                                                                                                                                                                | Winter cereals<br>Maize<br>Sunflower                                               |              |

679 <sup>1</sup> Number of resistance cases listed as the number of triplets (crop x bioagressor x PPP mode of action).

680 <sup>2</sup> Number of bioagressors distinguished according to their EPP0 code.

681 <sup>3</sup> Number of PPP modes of action distinguished according to their codes in the R4P unified classification (<https://osf.io/UBHR5>). Includes  
 682 legacy PPPs no longer authorized.

683 Update December 2019. Full list available at <https://osf.io/byv62/> or from <https://www.r4p-inra.fr>.

684

685

## 686 9. References

687

688 Ambec, S., & Desquilbet, M. (2012, 2012/01/01). Regulation of a Spatial Externality: Refuges versus  
689 Tax for Managing Pest Resistance. *Environmental and Resource Economics*, 51(1), 79-104.  
690 <https://doi.org/10.1007/s10640-011-9489-3>

691

692 Anand, S., & Sen, A. (1994). Human Development Index: Methodology and Measurement. *New York:*  
693 *Human Development Report Office Occasional Paper*, 12.

694

695 Blake, J. J., Gosling, P., Fraaije, B. A., Burnett, F. J., Knight, S. M., Kildea, S., & Paveley, N. D. (2018).  
696 Changes in field dose–response curves for demethylation inhibitor (DMI) and quinone  
697 outside inhibitor (QoI) fungicides against *Zymoseptoria tritici*, related to laboratory sensitivity  
698 phenotyping and genotyping assays. *Pest management science*, 74(2), 302-313.

699

700 Broekmans, J. F., Migliori, G. B., Rieder, H. L., Lees, J., Ruutu, P., Loddenkemper, R., & Raviglione, M.  
701 C. (2002, Apr). European framework for tuberculosis control and elimination in countries  
702 with a low incidence. Recommendations of the World Health Organization (WHO),  
703 International Union Against Tuberculosis and Lung Disease (IUATLD) and Royal Netherlands  
704 Tuberculosis Association (KNCV) Working Group. *European Respiratory Journal*, 19(4), 765-  
705 775. <https://doi.org/10.1183/09031936.02.00261402>

706

707 Carriere, Y., Brown, Z. S., Downes, S. J., Gujar, G., Epstein, G., Omoto, C., Storer, N. P., Mota-Sanchez,  
708 D., Sogaard Jorgensen, P., & Carroll, S. P. (2019, Mar 21). Governing evolution: A  
709 socioecological comparison of resistance management for insecticidal transgenic Bt crops  
710 among four countries. *Ambio*. <https://doi.org/10.1007/s13280-019-01167-0>

711

712 Corbel, V., Fonseca, D. M., Weetman, D., Pinto, J., Achee, N. L., Chandre, F., Coulibaly, M. B., Dusfour,  
713 I., Grieco, J., Juntarajumnong, W., Lenhart, A., Martins, A. J., Moyes, C., Ng, L. C.,  
714 Raghavendra, K., Vatandoost, H., Vontas, J., Muller, P., Kasai, S., Fouque, F., Velayudhan, R.,  
715 Durot, C., & David, J.-P. (2017, 2017/06/02). International workshop on insecticide resistance  
716 in vectors of arboviruses, December 2016, Rio de Janeiro, Brazil. *Parasites & Vectors*, 10(1),  
717 278. <https://doi.org/10.1186/s13071-017-2224-3>

718

719 Darwin, C. (1859). *On the Origin of Species by Means of Natural Selection Or the Preservation of*  
720 *Favoured Races in the Struggle for Life*. H. Milford; Oxford University Press.

721

722 DeAngelis, C. D. (2000). Conflict of interest and the public trust. *Jama*, 284(17), 2237-2238.

723

724 Délye, C., Jasieniuk, M., & Le Corre, V. (2013). Deciphering the evolution of herbicide resistance in  
725 weeds. *Trends in Genetics*, 29(11), 649-658.

726

727 Eisenhardt, K. M. (1989). Building theories from case study research. *Academy of management*  
728 *review*, 14(4), 532-550.

- 729  
730 Fuglie, K. O., & Toole, A. A. (2014). The evolving institutional structure of public and private  
731 agricultural research. *American journal of agricultural economics*, *96*(3), 862-883.
- 732  
733 Garnault, M., Duplaix, C., Leroux, P., Couleaud, G., Carpentier, F., David, O., & Walker, A. S. (2019).  
734 Spatiotemporal dynamics of fungicide resistance in the wheat pathogen *Zymoseptoria tritici*  
735 in France. *Pest management science*, *75*(7), 1794-1807.
- 736  
737 Givens, W. A., Shaw, D. R., Newman, M. E., Weller, S. C., Young, B. G., Wilson, R. G., Owen, M. D., &  
738 Jordan, D. L. (2011). Benchmark study on glyphosate-resistant cropping systems in the  
739 United States. Part 3: Grower awareness, information sources, experiences and management  
740 practices regarding glyphosate-resistant weeds. *Pest management science*, *67*(7), 758-770.
- 741  
742 Greckhamer, T., Misangyi, V. F., Elms, H., & Lacey, R. (2008). Using qualitative comparative analysis in  
743 strategic management research: An examination of combinations of industry, corporate, and  
744 business-unit effects. *Organizational Research Methods*, *11*(4), 695-726.
- 745  
746 Guedes, R. N. (2017, Mar). Insecticide resistance, control failure likelihood and the First Law of  
747 Geography. *Pest Manag Sci*, *73*(3), 479-484. <https://doi.org/10.1002/ps.4452>
- 748  
749 Hawkins, N. J., Bass, C., Dixon, A., & Neve, P. (2019). The evolutionary origins of pesticide resistance.  
750 *Biological Reviews*, *94*(1), 135-155.
- 751  
752 Heckathorn, D. D. (1997). Respondent-driven sampling: a new approach to the study of hidden  
753 populations. *Social problems*, *44*(2), 174-199.
- 754  
755 Heick, T. M., Justesen, A. F., & Jørgensen, L. N. (2017, 2017/11/01). Resistance of wheat pathogen  
756 *Zymoseptoria tritici* to DMI and QoI fungicides in the Nordic-Baltic region - a status. *European*  
757 *Journal of Plant Pathology*, *149*(3), 669-682. <https://doi.org/10.1007/s10658-017-1216-7>
- 758  
759 Hendriks, P., Gay, E., Chazel, M., Moutou, F., Danan, C., Richomme, C., Boue, F., Souillard, R.,  
760 Gauchard, F., & Dufour, B. (2011). OASIS: an assessment tool of epidemiological surveillance  
761 systems in animal health and food safety. *Epidemiology & Infection*, *139*(10), 1486-1496.
- 762  
763 Hicks, H. L., Comont, D., Coutts, S. R., Crook, L., Hull, R., Norris, K., Neve, P., Childs, D. Z., &  
764 Freckleton, R. P. (2018). The factors driving evolved herbicide resistance at a national scale.  
765 *Nature ecology & evolution*, *2*(3), 529.
- 766  
767 Hurley, T. M., & Frisvold, G. (2016). Economic barriers to herbicide-resistance management. *Weed*  
768 *Science*, *64*(SP1), 585-594.
- 769  
770 Johnson, W. G., & Gibson, K. D. (2006). Glyphosate-resistant weeds and resistance management  
771 strategies: an Indiana grower perspective. *Weed Technology*, *20*(3), 768-772.
- 772



- 773 Jørgensen, L. N., Bosch, F. v. d., Oliver, R. P., Heick, T. M., & Paveley, N. D. (2017). Targeting fungicide  
774 inputs according to need. *Annual Review of Phytopathology*, *55*(1), 181-203.  
775 <https://doi.org/10.1146/annurev-phyto-080516-035357>
- 776  
777 Jørgensen, L. N., Kudsk, P., & Ørum, J. E. (2019, 2019/05/01/). Links between pesticide use pattern  
778 and crop production in Denmark with special reference to winter wheat. *Crop Protection*,  
779 *119*, 147-157. <https://doi.org/https://doi.org/10.1016/j.cropro.2019.01.024>
- 780  
781 Jørgensen, L. N., Matzen, N., Hansen, J. G., Semaskiene, R., Korbas, M., Danielewicz, J., Glazek, M.,  
782 Maumene, C., Rodemann, B., & Weigand, S. (2018). Four azoles' profile in the control of  
783 Septoria, yellow rust and brown rust in wheat across Europe. *Crop Protection*, *105*, 16-27.
- 784  
785 Jørgensen, P. S., Folke, C., Henriksson, P. J. G., Malmros, K., Troell, M., & Zorzet, A. (2020,  
786 2020/03/17/). Coevolutionary Governance of Antibiotic and Pesticide Resistance. *Trends in*  
787 *Ecology & Evolution*. <https://doi.org/https://doi.org/10.1016/j.tree.2020.01.011>
- 788  
789 Krell, R. K., Fisher, M. L., & Steffey, K. L. (2016, Jan). A Proposal for Public and Private Partnership in  
790 Extension. *J Integr Pest Manag*, *7*(1), 4. <https://doi.org/10.1093/jipm/pmw001>
- 791  
792 Kudsk, P. (2010). Norbarag (nordic baltic resistance action group)—A new resistance action group  
793 covering Denmark, Estonia, Finland, Latvia, Lithuania, Norway and Sweden. *Outlooks on Pest*  
794 *Management*, *21*(5), 223-224.
- 795  
796 Kudsk, P., Jørgensen, L. N., & Ørum, J. E. (2018, 2018/01/01/). Pesticide Load—A new Danish  
797 pesticide risk indicator with multiple applications. *Land Use Policy*, *70*(Supplement C), 384-  
798 393. <https://doi.org/https://doi.org/10.1016/j.landusepol.2017.11.010>
- 799  
800 Labbé, P., Berticat, C., Berthomieu, A., Unal, S., Bernard, C., Weill, M., & Lenormand, T. (2007). Forty  
801 years of erratic insecticide resistance evolution in the mosquito *Culex pipiens*. *PLoS genetics*,  
802 *3*(11).
- 803  
804 Lambert, D. M., Larson, J. A., Roberts, R. K., English, B. C., Zhou, X. V., Falconer, L. L., Hogan Jr, R. J.,  
805 Johnson, J. L., & Reeves, J. M. (2017). "Resistance is futile": estimating the costs of managing  
806 herbicide resistance as a first-order Markov process and the case of US upland cotton  
807 producers. *Agricultural Economics*, *48*(3), 387-396.
- 808  
809 Leach, A. B., Hoepfing, C. A., & Nault, B. A. (2019). Grower adoption of insecticide resistance  
810 management practices increase with extension-based program. *Pest management science*,  
811 *75*(2), 515-526.
- 812  
813 Lemarié, S., & Marcoul, P. (2018, 2018/01/01/). Coordination and information sharing about pest  
814 resistance. *Journal of Environmental Economics and Management*, *87*, 135-149.  
815 <https://doi.org/https://doi.org/10.1016/j.jeem.2017.05.009>
- 816

- 817 Livne-Tarandach, R., Hawbaker, B., Boren, B. L., & Jones, C. (2015). Qualitative comparative analysis.  
818 *Handbook of qualitative organizational research: Innovative pathways and methods*, 156.
- 819
- 820 Llewellyn, R. S., Lindner, R. K., Pannell, D. J., & Powles, S. B. (2007). Herbicide resistance and the  
821 adoption of integrated weed management by Western Australian grain growers. *Agricultural*  
822 *Economics*, 36(1), 123-130.
- 823
- 824 Mc Nulty, K., Soon, J. M., Wallace, C. A., & Nastasijevic, I. (2016). Antimicrobial resistance monitoring  
825 and surveillance in the meat chain: A report from five countries in the European Union and  
826 European Economic Area. *Trends in food science & technology*, 58, 1-13.
- 827
- 828 Mölsted, S., Löfmark, S., Carlin, K., Erntell, M., Aspevall, O., Blad, L., Hanberger, H., Hedin, K.,  
829 Hellman, J., & Norman, C. (2017). Lessons learnt during 20 years of the Swedish strategic  
830 programme against antibiotic resistance. *Bulletin of the World Health Organization*, 95(11),  
831 764.
- 832
- 833 Palumbi, S. R. (2001). Humans as the world's greatest evolutionary force. *Science*, 293(5536), 1786-  
834 1790.
- 835
- 836 Parliament, E. (2009). Directive 2009/128/EC of the European Parliament and of the Council of 21  
837 October 2009 establishing a framework for Community action to achieve the sustainable use  
838 of pesticides. *Official Journal of the European Union*, 309, 71-86.
- 839
- 840 Peterson, M. A., Collavo, A., Ovejero, R., Shivrain, V., & Walsh, M. J. (2018). The challenge of  
841 herbicide resistance around the world: a current summary. *Pest management science*,  
842 74(10), 2246-2259. <https://doi.org/10.1002/ps.4821>
- 843
- 844 Pinkse, J., & Kolk, A. (2012). Addressing the climate change—sustainable development nexus: The  
845 role of multistakeholder partnerships. *Business & Society*, 51(1), 176-210.
- 846
- 847 Pruden, A., Alcalde, R. E., Alvarez, P. J., Ashbolt, N., Bischel, H., Capiro, N. L., Crossette, E., Frigon, D.,  
848 Grimes, K., & Haas, C. N. (2018). An environmental science and engineering framework for  
849 combating antimicrobial resistance. *Environmental Engineering Science*, 35(10), 1005-1011.
- 850
- 851 R4P. (2016). Trends and Challenges in Pesticide Resistance Detection. *Trends in Plant Science*, 21(10),  
852 834-853. <https://doi.org/10.1016/j.tplants.2016.06.006>
- 853
- 854 R Core Team. (2019). *R: A Language and Environment for Statistical Computing*. In R Foundation for  
855 Statistical Computing. <http://www.R-project.org/>
- 856
- 857 REX\_Consortium. (2013). Heterogeneity of selection and the evolution of resistance. *Trends in*  
858 *Ecology & Evolution*, 28(2), 110-118.  
859 <http://linkinghub.elsevier.com/retrieve/pii/S0169534712002352>
- 860

- 861 Robinson, C., Holland, N., Leloup, D., & Muilerman, H. (2013). Conflicts of interest at the European  
862 Food Safety Authority erode public confidence. *J Epidemiol Community Health*, 67(9), 717-  
863 720.
- 864  
865 Ulber, L., & Rissel, D. (2018). Farmers' perspective on herbicide-resistant weeds and application of  
866 resistance management strategies: results from a German survey. *Pest management science*,  
867 74(10), 2335-2345.
- 868  
869 UNDP. (2016). *Human Development Report 2016: Human Development for Everyone*. United Nation  
870 Development Programme. [http://hdr.undp.org/en/content/human-development-report-](http://hdr.undp.org/en/content/human-development-report-2016)  
871 [2016](http://hdr.undp.org/en/content/human-development-report-2016)
- 872  
873 van den Bosch, F., Oliver, R., van den Berg, F., & Paveley, N. (2014). Governing Principles Can Guide  
874 Fungicide-Resistance Management Tactics. *Annual Review of Phytopathology*, 52(1), 175-  
875 195. <https://doi.org/10.1146/annurev-phyto-102313-050158>
- 876  
877 Wang, S. L., Heisey, P. W., Huffman, W. E., & Fuglie, K. O. (2013). Public R&D, private R&D, and US  
878 agricultural productivity growth: Dynamic and long-run relationships. *American journal of*  
879 *agricultural economics*, 95(5), 1287-1293.
- 880  
881 Werner, N., Mcewen, S., & Kreienbrock, L. (2018). Monitoring Antimicrobial Drug Usage in Animals:  
882 Methods and Applications. *Microbiology spectrum*, 6(4).
- 883  
884 Yin, R. K. (2003). *Applications of case study research* (2nd ed.). Sage Publications.
- 885  
886 Zhou, X., Larson, J. A., Lambert, D. M., Roberts, R. K., English, B. C., Bryant, K. J., Mishra, A. K.,  
887 Falconer, L. L., Hogan Jr, R. J., Johnson, J. L., & Reeves, J. M. (2015). Farmer experience with  
888 weed resistance to herbicides in cotton production. *AgBioForum*, 18(1), 114-125.
- 889  
890 Zignol, M., Cabibbe, A. M., Dean, A. S., Glaziou, P., Alikhanova, N., Ama, C., Andres, S., Barbova, A.,  
891 Borbe-Reyes, A., & Chin, D. P. (2018). Genetic sequencing for surveillance of drug resistance  
892 in tuberculosis in highly endemic countries: a multi-country population-based surveillance  
893 study. *The Lancet Infectious Diseases*, 18(6), 675-683.
- 894  
895  
896

897 **FIGURE LEGENDS**

898 **Figure 1:** The three levels of investigation: the National Resistance Monitoring Landscape (NRML),  
899 the Resistance Monitoring System (RMS), and the Resistance Monitoring Information Product (RMIP).

900

901 **Figure 2:** Profile of questionnaire responses: number of questionnaire respondents (A) across the  
902 world, and (B) according to their area of expertise in PPP resistance by bioaggressor type. (C) Number  
903 of RMSs per RMS category described by the respondents (one respondent could describe up to one  
904 RMS belonging to each category), and (D) number of countries with at least one described RMS for  
905 each category of RMS.

906

907 **Figure 3:** Resistance monitoring at the country level: (A) relationship between the Human  
908 Development Index (HDI) of the countries surveyed and the composition of their National Resistance  
909 Monitoring Landscape (NRML), (B) relationship between the HDI and the source of data on PPP use,  
910 (C) relationship between the sources of data on PPP use in the countries surveyed and their NRML.

911

912 **Figure 4:** Characteristics of the different Resistance Monitoring System (RMS) categories: (A) number  
913 of RMSs and bioaggressor types monitored (178 out of the 250 described RMSs included information  
914 on the type of bioaggressor monitored); (B) proportions of the types of bioaggressor monitored  
915 according to the RMS categories; (C) orientation of the field sampling protocol according to the RMS  
916 categories (200 out of the 250 described RMSs included information on the orientation of the  
917 sampling protocol); (D) timing and frequency of publication of Resistance Monitoring Information  
918 Products (RMIPs) according to the RMS categories (200 out of the 250 described RMSs included  
919 information on the timing of publication).

920

921 **Figure 5:** Complementarities of Resistance Monitoring Systems (RMS) and actors: (A) distribution of  
922 RMS funding sources, for all RMS categories taken together, for Academic RMSs, for Governmental  
923 RMSs, and for Private RMSs (174 out of the 250 described RMSs included information on funding);  
924 (B) number of actor types participating in the choice of topics for each RMS category (227 out of the  
925 250 described RMSs included information on the actor types participating in the choice of topics); (C)  
926 type of experts in charge of data analysis and interpretation depending on RMS categories (219 out  
927 of the 250 described RMSs included information on the type of experts in charge of data analysis);  
928 (D) influence of the number of RMS categories in the country and the National Resistance Monitoring  
929 Landscape (NRML, in color) on the number of surveyed bioaggressor types in the country. Circle size is  
930 proportionate to the number of countries (stipulated in the middle).

931

932 **Figure 6:** Maps of the intensity of pesticide use (TFI) in Denmark, as an average of four growing  
933 seasons (2011-2014). The maps cover three groups of active ingredients: pyrethroids, triazoles, and  
934 glyphosate. The maps can provide useful guidance on where the risks for specific resistance problems  
935 are higher. Coloring on the maps represents the distribution of calculated values. Blue represents the  
936 8.33% lowest values, and red the 8.33% highest, while the ten color codes in between depict a linear  
937 scale with each color code representing 8.33% of the interval between the lowest and highest values.

938

939 **Figure S1.1:** Probability of presence of one RMS category in a country depending on the Human  
940 Development Index (HDI) of the country. A) Probability of an Academic RMS in the country (non-  
941 significant correlation,  $Z = 0.79$ ,  $p = 0.429$ ), B) Probability of a Governmental RMS in the country  
942 (significant correlation,  $Z = 2.37$ ,  $p = 0.018$ ), C) Probability of a Private RMS in the country (non-  
943 significant correlation,  $Z = 0.32$ ,  $p = 0.746$ ). Logistic regression model prediction (solid line) and 95 %  
944 CI (grey band) are presented.

945

946 **Figure S1.2:** Probability of presence of one type of source for monitoring of PPP use data in a country  
947 depending on the Human Development Index (HDI) of the country. A) Probability of PPP use data  
948 monitored by PPP sales in the country (significant correlation,  $Z = 2.34$ ,  $p = 0.019$ ), B) Probability of  
949 PPP use data monitored by PPP survey in the country (marginally significant correlation,  $Z = 1.90$ ,  
950  $p = 0.058$ ). Logistic regression model prediction (solid line) and 95 % CI (grey band) are presented.  
951

A

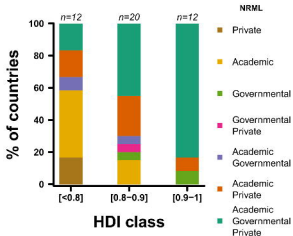

B

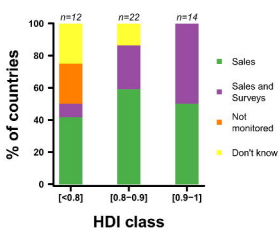

C

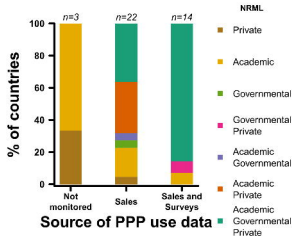

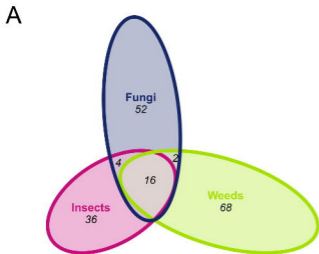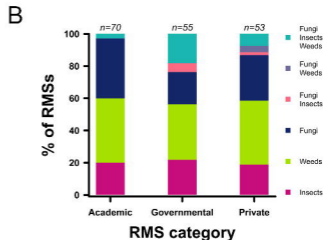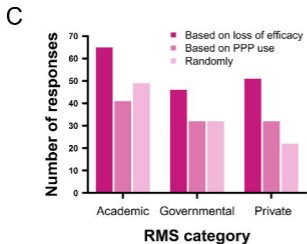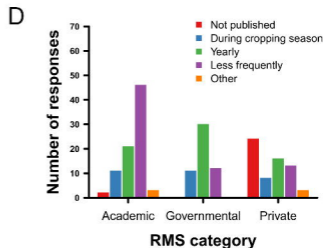



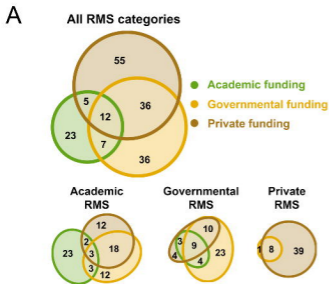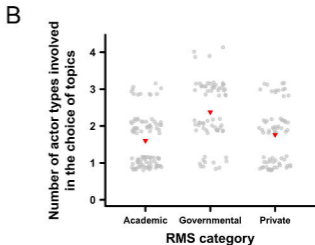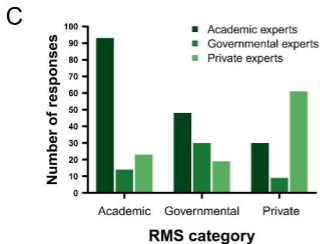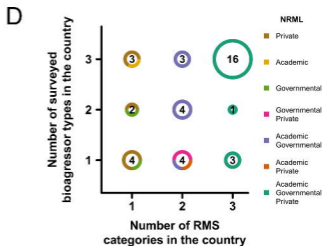

Pyrethroids (IRAC 3) (TFI)

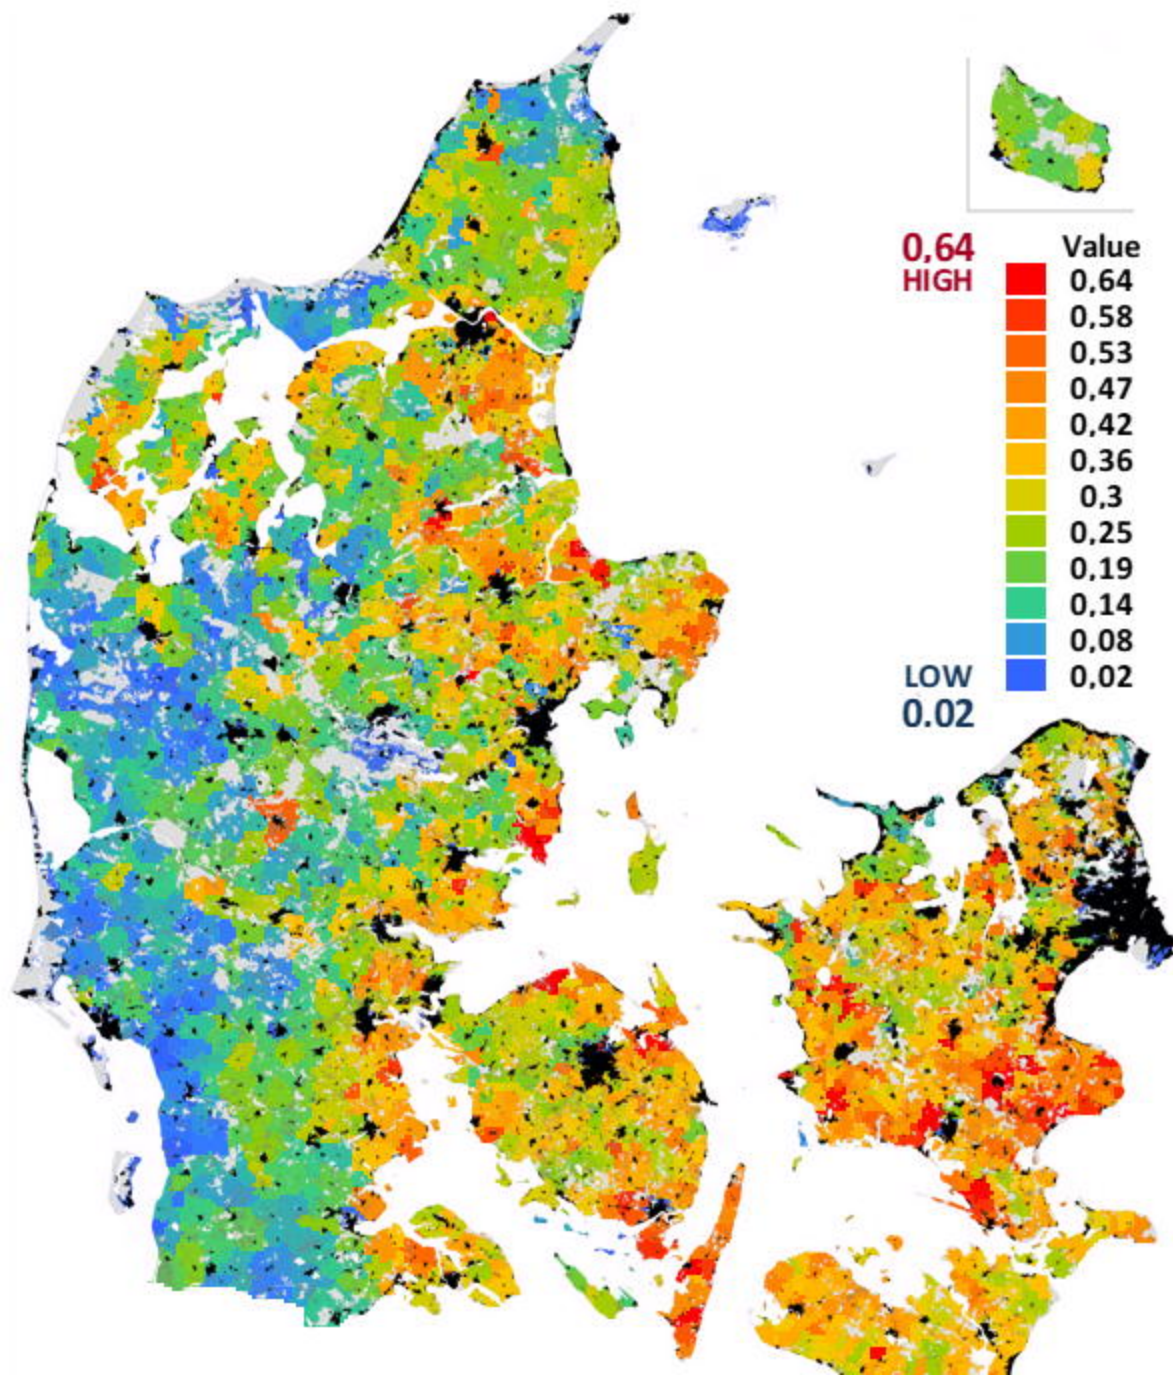

Triazoles (FRAC G1 3) (TFI)

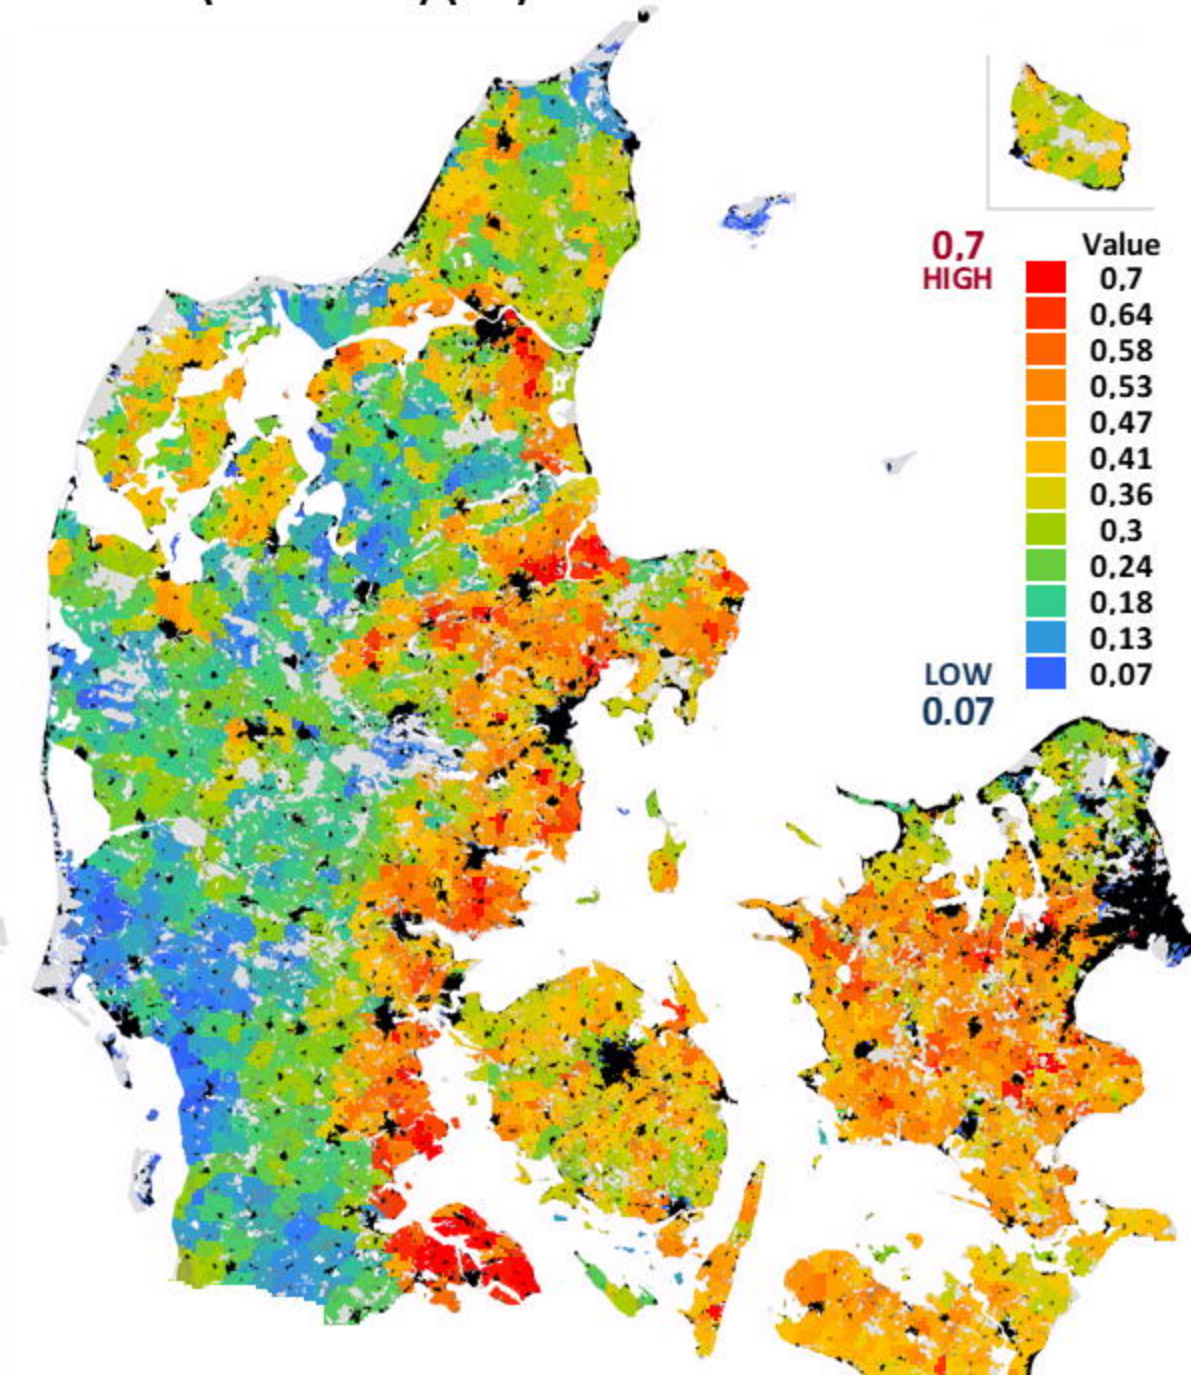

Glyphosate (HRAC G) (TFI)

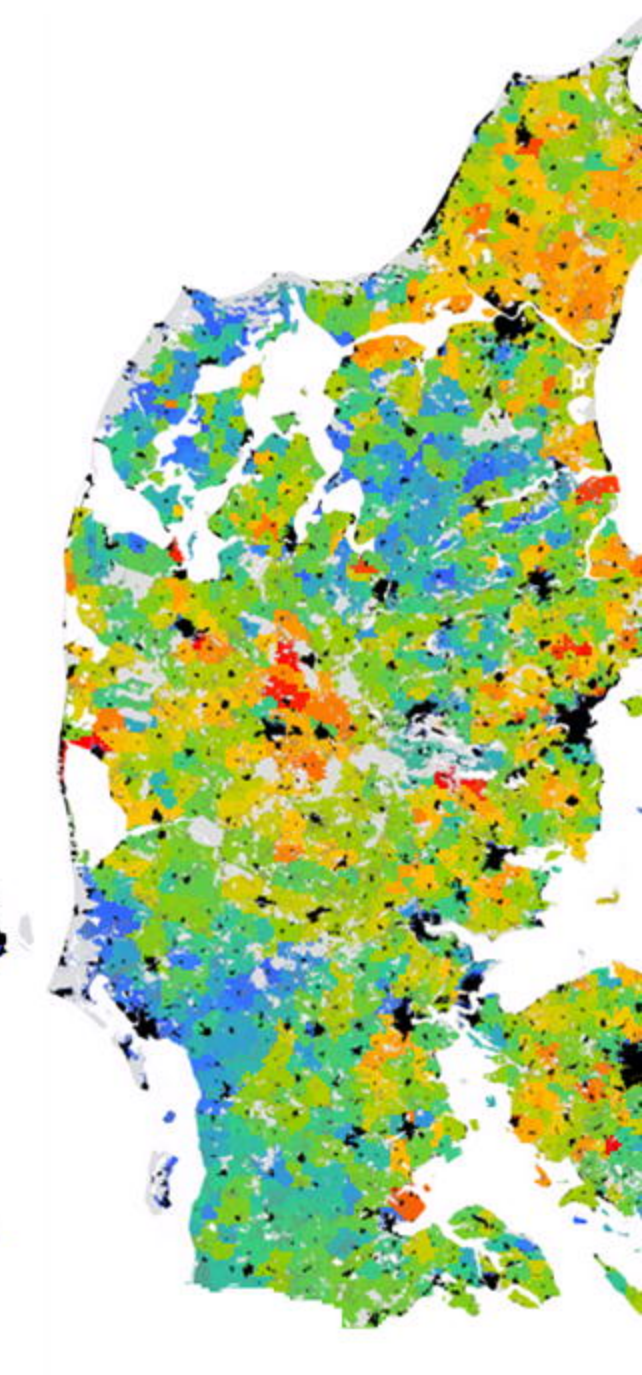

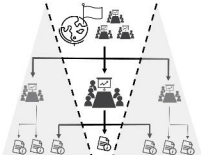

**The National Resistance Monitoring Landscape (NRML) level:**  
At the country level, all existing resistance monitoring systems (RMSs) and their interactions.

**The Resistance Monitoring System (RMS) level:**  
An organization or a group of organizations with their own objectives and resources (financial, technical and human) and rationales that organize PPP resistance monitoring and produce Resistance Monitoring Information Products (RMIPs). An RMS may produce several different information products.

**The Resistance Monitoring Information Product (RMIP) level:**  
A deliverable that enables actors to visualize and track the development of resistance, whether or not shared publicly.

A

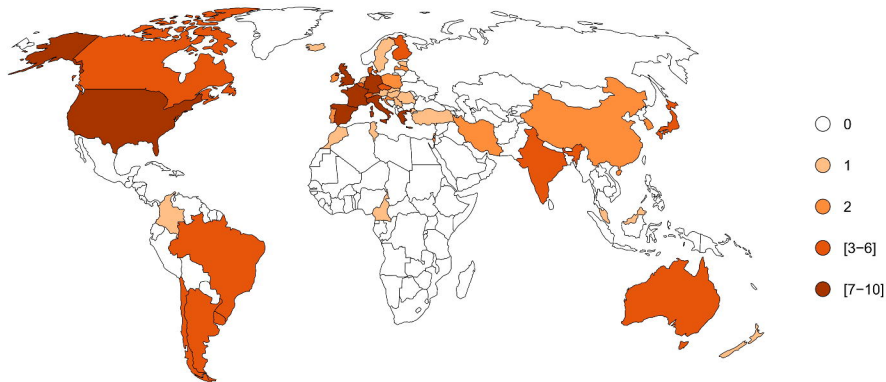

B

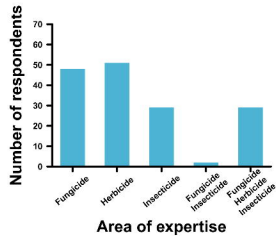

C

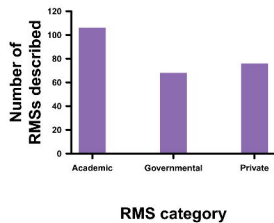

D

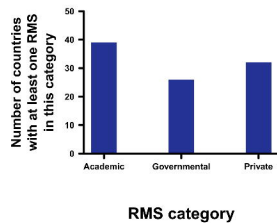

Source: https://www.biorxiv.org/content/10.1101/2020.07.30.228239v2.full.pdf
